# Supplementary material for: Novel Inhibitors of Cholesterol Degradation in Mycobacterium tuberculosis Reveal How the Bacterium’s Metabolism Is Constrained by the Intracellular Environment
Source: PLoS Pathog. 2015 Feb 12;11(2):e1004679. doi: 10.1371/journal.ppat.1004679 (PMC4335503; doi:10.1371/journal.ppat.1004679)
Supplement: S1 Table — (XLSX) [file ppat.1004679.s005.xlsx]

## Sheet: Sheet1
Normalized ratio of experimental compound to DMSO Control
	V-12-003679	V-12-007958	V-12-007960	Description
Induced Genes
MT0325	1.533	1.28	1.399	Hypothetical protein
MT0407.1	1.365	1.406	1.299	Hypothetical protein
MT2038	1.695	1.257	1.652	Hypothetical protein
MT2367	1.228	1.227	1.252	Hypothetical protein
MT2417	1.207	1.206	1.341	Hypothetical protein
Rv0080	1.278	1.212	1.301	Conserved hypothetical protein
Rv0116c	1.447	1.32	1.306	Putative transpeptidase
Rv0188	1.442	1.557	1.385	Putative membrane protein
Rv0211 (pckA)	1.929	1.59	1.509	Gluconeogenesis
Rv0311	1.513	1.549	1.379	Conserved hypothetical protein
Rv0676c (mmpl5)	1.342	1.364	1.415	Membrane transport
Rv0678	1.397	1.385	1.464	Conserved hypothetical protein
Rv0786c	1.246	1.204	1.241	Conserved hypothetical protein
Rv0885	1.566	1.346	1.236	Conserved hypothetical protein
Rv0905 (echa6)	1.363	1.337	1.279	Enoyl-CoA hydratase
Rv0906	1.336	1.317	1.236	Conserved hypothetical protein
Rv0981	1.463	1.241	1.203	Two component response regulator
Rv1057	1.569	1.603	1.572	Conserved hypothetical
Rv1188	1.817	1.442	1.366	Putative proline hydratase
Rv1216c	1.654	1.521	1.58	Putative membrane protein
Rv1217c	1.796	1.749	1.566	Membrane transport
Rv1218c	2.027	1.8	1.584	Membrane transport
Rv1219c	1.748	1.707	1.597	Transcriptional regulator
Rv1221 (sigE)	1.603	1.799	1.669	Stress response sigma factor
Rv1316c (ogt)	1.263	1.205	1.234	DNA repair
Rv1460	1.441	1.385	1.395	Conserved hypothetical protein
Rv1461	1.49	1.289	1.317	Conserved hypothetical protein
Rv1462	1.346	1.215	1.282	Conserved hypothetical protein
Rv1463	1.365	1.312	1.227	Conserved hypothetical protein
Rv1646	1.37	1.377	1.257	PE family protein PE17
Rv1647	1.566	1.482	1.42	Adenlylate cyclase
Rv1809	1.405	1.214	1.254	PPE family protein PPE33
Rv1854c (ndh)	2.005	1.511	1.523	NADH dehydrogenase
Rv1868	1.417	1.452	1.277	Conserved hypothetical protein
Rv2280	1.462	1.31	1.223	Putative oxidoreductase
Rv2428 (ahpC)	1.427	1.299	1.513	Alkyl-peroxidase C
Rv2429 (ahpD)	1.718	1.343	1.598	Alkyl-peroxidase D
Rv2454c	1.412	1.221	1.22	Putative oxidoreductase
Rv2640c	1.69	1.378	1.313	Transcriptional regulator
Rv2707	1.206	1.207	1.292	Putative membrane protein
Rv2729c	1.523	1.535	1.407	Putative membrane protein
Rv2745c	1.306	1.236	1.234	Transcriptional regulator
Rv2780 (ald)	1.54	1.529	1.548	L-Alanine dehydrogenase
Rv3016 (lpqA)	1.564	1.467	1.489	Putative lipoprotein
Rv3139 (fade24)	1.396	1.248	1.551	Acyl-CoA dehydrogenase
Rv3140 (fade23)	1.317	1.202	1.495	Acyl-CoA dehydrogenase
Rv3269	1.889	1.35	1.256	Conserved hypothetical protein
Rv3287c (rbsW)	1.229	1.269	1.299	Anti-sigma factor
Rv3288c	1.438	1.293	1.282	Conserved hypothetical protein
Rv3484 (cpsA)	1.337	1.34	1.36	Conserved hypothetical protein
Normalized ratio of experimental compoubd to DMSO Control
	V-12-003679	V-12-007958	V-12-007960	Description
Repressed Genes
MT1414.1	0.683	0.724	0.739	Hypothetical protein
MT3033	0.769	0.76	0.737	Hypothetical protein
MT3846	0.798	0.739	0.831	Hypothetical protein
MT3847	0.738	0.682	0.74	Hypothetical protein
Rv0055 (rpsR)	0.684	0.76	0.717	Ribosomal protein
Rv0058 (dnaB)	0.602	0.64	0.736	DNA helicase
Rv0166 (fadd5)	0.649	0.426	0.625	Putative fatty acid CoA ligase
Rv0167	0.702	0.671	0.738	Conserved membrane protein
Rv0169 (mce1)	0.78	0.673	0.825	Mce family protein
Rv0170	0.689	0.658	0.745	Mce family protein
Rv0171	0.767	0.701	0.83	Mce family protein
Rv0172	0.604	0.542	0.653	Mce family protein
Rv0174	0.807	0.719	0.818	Mce family protein
Rv0176	0.76	0.713	0.793	Mce family protein
Rv0233 (nrdB)	0.784	0.614	0.787	Ribonucleoside reductase
Rv0298	0.749	0.75	0.791	Conserved hypothetical protein
Rv0458	0.77	0.714	0.741	Putative aldehyde dehydrogenase
Rv0643c (mmaA3)	0.66	0.668	0.647	Methoxy mycolic acid synthase 3
Rv0651 (rplJ)	0.781	0.744	0.706	Ribosomal protein
Rv0655	0.707	0.647	0.667	Ribonucleotide-transport
Rv0668 (rpoC)	0.593	0.686	0.765	DNA-directed RNA polymerase RpoC
Rv0682 (rpsL)	0.786	0.807	0.798	Ribosomal protein
Rv0683 (rpsG)	0.717	0.783	0.766	Ribosomal protein
Rv0684 (fusA)	0.673	0.596	0.682	Putative elongation factor G FusA1
Rv0700 (rpsJ)	0.675	0.67	0.645	Ribosomal protein
Rv0701 (rplc)	0.642	0.72	0.699	Ribosomal protein
Rv0702 (rplD)	0.68	0.636	0.62	Ribosomal protein
Rv0703 (rplW)	0.582	0.691	0.645	Ribosomal protein
Rv0704 (rplB)	0.673	0.722	0.744	Ribosomal protein
Rv0705 (rpsS)	0.773	0.727	0.761	Ribosomal protein
Rv0706 (rplV)	0.538	0.602	0.617	Ribosomal protein
Rv0707 (rpsC)	0.597	0.704	0.726	Ribosomal protein
Rv0708 (rplP)	0.752	0.724	0.724	Ribosomal protein
Rv0709 (rpmC)	0.623	0.748	0.745	Ribosomal protein
Rv0710 (rpsQ)	0.649	0.766	0.664	Ribosomal protein
Rv0714 (rplN)	0.763	0.678	0.748	Ribosomal protein
Rv0715 (rplX)	0.638	0.693	0.682	Ribosomal protein
Rv0716 (rplE)	0.738	0.794	0.813	Ribosomal protein
Rv0717 (rpsN)	0.766	0.668	0.705	Ribosomal protein
Rv0718 (rpsH)	0.608	0.701	0.677	Ribosomal protein
Rv0719 (rplF)	0.691	0.725	0.769	Ribosomal protein
Rv0720 (rplR)	0.738	0.678	0.688	Ribosomal protein
Rv0722 (rpmD)	0.696	0.747	0.746	Ribosomal protein
Rv0723 (rplO)	0.801	0.754	0.726	Ribosomal protein
Rv0814c (ssec2)	0.822	0.821	0.788	Ribosomal protein
Rv1297 (rho)	0.546	0.644	0.708	Putative transcription termination factor Rho
Rv1361c	0.694	0.695	0.807	PPE family protein PPE19
Rv1396c	0.829	0.619	0.711	PE family protein PGRS_25
Rv1505c	0.729	0.751	0.788	Conserved hypothetical protein
Rv1641 (infC)	0.771	0.724	0.73	Putative initiation factor InfC
Rv1644 (tsnR)	0.656	0.76	0.757	RNA methyltransferase
Rv2189c	0.701	0.744	0.75	Conserved hypothetical protein
Rv2246 (kasB)	0.807	0.823	0.656	ACP synthase
Rv2439c (proB)	0.787	0.696	0.68	Putative glutamate kindase
Rv2554c	0.752	0.815	0.816	Conserved hypothetical protein
Rv2564	0.703	0.786	0.738	ABC transporter
Rv2704	0.709	0.747	0.81	Conserved hypothetical protein
Rv2782c (perpR)	0.61	0.615	0.702	Putative zinc protease
Rv2783c (gpsI)	0.704	0.66	0.681	bifunctional polyribonucleotide nucleotidyltransferase
Rv2936 (drrA)	0.684	0.765	0.761	ABC transporter
Rv2940c	0.772	0.733	0.782	Mycocerosic acid synthase
Rv2947c (pks15)	0.642	0.636	0.575	Probable polyketide synthase Pks15
Rv2948c (fadd22)	0.756	0.822	0.774	PGL synthesis
Rv2950c (fadd29)	0.645	0.724	0.686	PGL synthesis
Rv3028c (fixB)	0.762	0.808	0.827	Electron transfer flavoprotein
Rv3145 (nuoA)	0.706	0.773	0.795	NADH dehydrogenase
Rv3147 (nuoC)	0.832	0.801	0.824	NADH oxidoreductase
Rv3150 (nuoF)	0.816	0.795	0.811	NADH dehydrogenase
Rv3247c (tmk)	0.797	0.812	0.824	Thymidylate kinase
Rv3295	0.633	0.638	0.651	Putative transcriptional regulator TetR-family
Rv3455c (truA)	0.666	0.68	0.681	tRNA synthase
Rv3456c (rplQ)	0.661	0.716	0.697	Ribosomal protein
Rv3459c (rpsK)	0.742	0.748	0.737	Ribosomal protein
Rv3460c (rpsM)	0.622	0.754	0.784	Ribosomal protein
Rv3613c	0.701	0.685	0.773	Conserved hypothetical protein
Rv3671c	0.726	0.825	0.822	Conserved hypothetical protein
Rv3742c	0.61	0.578	0.808	Putative oxidoreductase
Rv3920c	0.751	0.731	0.78	Conserved hypothetical protein
Rv3921c	0.638	0.579	0.663	Conserved hypothetical protein
Rv3922c	0.596	0.667	0.806	Conserved hypothetical protein
Methylcitrate Cycle
Rv1129c (prpR)	0.882	0.868	0.885	Methylcitrate gene regulator
Rv1130 (prpD)	0.931	0.85	0.948	Methylcitrate dehydratase
Rv1131 (prpC)	0.92	0.742	0.866	Methylcitrate synthase
kstR1/R2 Regulon
Rv1628c	0.774	0.859	0.803	Conserved hypthetical protein
Rv3505 (fade27)	0.654	1.039	0.831	Acyl-CoA dehydrogenase
Rv3523	0.621	0.803	0.682	Acyl-CoA thiolase
Rv3526	0.813	0.968	0.754	Ketosteroid hydroxylase
Rv3530c	0.763	0.936	0.695	Oxidoreductase
Rv3540c	0.798	0.837	0.792	Acyl-CoA thiolase
Rv3543c (fade29)	0.778	0.855	0.724	Acyl-CoA dehydrogenase
Rv3544c (fade28)	0.777	0.962	0.814	Acyl-CoA dehydrogenase
Rv3549c	0.603	1.013	0.623	Putative dehydrogenase
Rv3550 (echa20)	0.455	0.985	0.533	Putative enoyl-CoA hydratase
Rv3551	0.604	1.008	0.626	Putative CoA transferase
Rv3552	0.664	1.03	0.697	Putative CoA transferase
Rv3553	0.644	1.059	0.779	Oxidoreductase
Rv3556c (fada6)	0.622	0.899	0.727	Acetyltransferase
Rv3557c	0.519	0.862	0.646	Transcriptional regulation
Rv3559c	0.735	0.941	0.787	Oxidoreductase
Rv3560c (fade30)	0.772	0.804	0.8	Acyl-CoA dehydrogenase
Rv3561 (fadd3)	0.612	0.835	0.755	Fatty acid CoA synthetase
Rv3562 (fade31)	0.637	0.997	0.69	Acyl CoA dehydrogenase
Rv3563 (fade32)	0.799	0.925	0.769	Acyl CoA dehydrogenase
Rv3565 (aspB)	0.637	0.957	0.744	Putative aspartate aminotransferase
